# Supplementary material for: Small-Molecule Quinolinol Inhibitor Identified Provides Protection against BoNT/A in Mice
Source: PLOS journal article supplement (doi:10.1371/journal.pone.0047110), 2012-10-11
Supplement: S1 (10.1371/journal.pone.0047110.s001) [file journal.pone.0047110.s001]

Table S1. List of compounds selected based on similarity search (1-20 New leads and 21-25 reported molecules) with binding energy and Ki obtained by docking.

| 1 | CB6373104 | -8.9 | 297.23 nM | 7-[(4-Chlorophenyl)(2-pyridinyl amino)methyl]-8-quinolinol |
| --- | --- | --- | --- | --- |
| 2 | CB6372039 | -9.85 | 60.5 nM | 7-{(2,4-Dichlorophenyl)[(4-methyl-2-pyridinyl) amino]methyl}-8-quinolinol |
| 3 | CB6372208 | -9.77 | 69.1 nM | 7-{(3,4-Dimethoxyphenyl)[(4-methyl-2-pyridinyl) amino]methyl}-8-quinolinol |
| 4 | CB6372717 | -9.39 | 130.64 nM | 7-[(4-Isopropoxyphenyl)(2-pyridinyl amino) methyl]-8-quinolinol |
| 5 | CB6376015 | -9.71 | 76.61 nM | 7-{1,3-Benzodioxol-5-yl[(6-methyl-2-pyridinyl) amino]methyl}-8-quinolinol |
| 6 | CB6377128 | -12.64 | 539.23 pM | 7-[[4-(Methylthio)phenyl](2-pyridinyl amino) methyl]-8-quinolinol |
| 7 | CB6378306 | -11.21 | 6.07 nM | 7-[(3-Bromo-4,5-dimethoxy phenyl) (2-pyridinyl amino)methyl]-8-quinolinol |
| 8 | CB6379918 | -10.35 | 26.16 nM | 7-[(4-Propoxyphenyl)(2-pyridinylamino) methyl]-8-quinolinol |
| 9 | CB6634752 | -10.42 | 22.84 nM | 7-{[4-(Cyclopentyloxy)phenyl][(6-methyl-2-pyridinyl)amino]methyl}-2-methyl-8-quinolinol |
| 10 | CB7887535 | -11.51 | 3.63 nM | 5-Chloro-7-[(3-chlorophenyl)(2-pyridinylamino)methyl]-8-quinolinol |
| 12 | CB7925339 | -12.25 | 1.04 nM | 7-[[4-(Allyloxy)phenyl](2-pyridinyl amino)methyl]5-chloro-8-quinolinol |
| 13 | CB6372690 | -9.31 | 148.93 nM | 7-{(3-Fluorophenyl)[(6-methyl-2-pyridinyl) amino]methyl}-2-methyl-8-quinolinol |
| 14 | CB6376685 | -8.48 | 610.97 nM | 7-[[4-(Allyloxy)phenyl](2-pyridinyl amino)methyl]2-methyl-8-quinolinol |
| 16 | NSC84091 | -9.67 | 81.4 nM | 7-((2-Chloro-5-(trifluoromethyl) anilino)(phenyl)methyl)-8-quinolinol |
| 17 | NSC84093 | -9.33 | 145.66 nM | 7-(Phenyl(4-toluidino)methyl)-8-quinolinol |
| 18 | NSC647658 | -10.07 | 41.82 nM | 2-Anilino-9-phenyl-2,3-dihydro-1H-pyrrolo [3,4-b]quinolin-1-one |
| 19 | NSC [84087](http://129.43.27.140/cgi-bin/nci2.tcl?op1=nsc&data1=84087&output=detail&highbondlist=&highatomlist=&conflist=-1&passid=) | -9.93 | 52.95 nM | 7-((2-Methoxyanilino) (phenyl) methyl)-8-quinolinol |
| 20 | NSC66811 | -10.84 | 11.38 nM | 2-Methyl-7-[phenyl (phenylamino) methyl] quinolin-8-ol |
| 21 | CB7969312 | -10.3 | 28.3 nM | 5-chloro-7-[(4-ethoxyphenyl)(3-pyri dinylamino)methyl]-8-quino- linol |
| 22 | CB7967495 | -11.42 | 4.26 nM | 7-{(3-pyridinylamino)[4-(trifluoro methyl)phenyl]methyl}-8-quino linol |
| 23 | NSC 1010 | -10.44 | 22.36 nM | 7-((4-(hydroxy(oxido)amino) ani lino)(phenyl) methyl)-8-quinolinol |
| 24 | NSC [84090](http://129.43.27.140/cgi-bin/nci2.tcl?op1=nsc&data1=84090&output=detail&highbondlist=&highatomlist=&conflist=-1&passid=) | -11.83 | 2.11 nM | 7-((4-chloroanilino)(phenyl) meth- yl)-8-quinolinol |
| 25 | NSC [84096](http://129.43.27.140/cgi-bin/nci2.tcl?op1=nsc&data1=84096&output=detail&highbondlist=&highatomlist=&conflist=-1&passid=) | -10.37 | 25.09 nM | 7-(phenyl(8-quinolinylamino) methyl) -8-quinolinol |
