# Supplementary material for: Small-Molecule Quinolinol Inhibitor Identified Provides Protection against BoNT/A in Mice
Source: PLOS journal article supplement (doi:10.1371/journal.pone.0047110), 2012-10-11
Supplement: S2 (10.1371/journal.pone.0047110.s002) [file journal.pone.0047110.s002]

Table S2 Structural formula and results of initial screening at 100 µM of small-molecules on synaptosome against recombinant full-length BoNT/A light chain (200 nM).

|  | **Name & Score of ligands** | **3D Structure of ligands** |
| --- | --- | --- |
| 1 | ID : CB7969312  5-chloro-7-[(4-ethoxyphenyl)(3-pyridinyl amino)methyl]-8-quinolinol  MW: 405  Ki : 28.3 nM  BE: -10.3  Inhibition (%): 90 |  |
| 2 | ID : CB7967495  7-{(3-pyridinylamino)[4-(trifluoromethyl) phenyl]methyl}-8-quinolinol  MW: 395  Ki : 4.26 nM  BE: -11.42  Inhibition (%): 100 |  |
| 3 | ID : CB6377128  7-[[4-(methylthio)phenyl](2-pyridinyl amino)methyl]-8-quinolinol  MW: 373  Ki : 539.23 pM  BE: -12.64  Inhibition (%): 90 |  |
| 4 | ID : CB7925339  7-[[4-(allyloxy)phenyl](2-pyridinylamino) methyl]-5-chloro-8-quinolinol  MW: 418  Ki : 1.04 nM  BE: -12.25  Inhibition (%): 100 |  |
| 5 | ID : CB7887535  5-chloro-7-[(3-chlorophenyl)(2-pyridinyl amino)methyl]-8-quinolinol  MW: 432  Ki : 3.63 nM  BE: -11.51  Inhibition (%): 100 |  |
| 6 | ID : CB6378306  7-[(3-bromo-4,5-dimethoxyphenyl)(2-pyridinylamino)methyl]-8-quinolinol  MW: 466  Ki : 6.07 nM  BE: -11.21  Inhibition (%): 100 |  |
| 7 | ID : CB6376015  7-{1,3-benzodioxol-5-yl[(6-methyl-2-pyridinyl)amino]methyl}-8-quinolinol  MW: 389  Ki : 76.61 nM  BE: -9.71  Inhibition (%): 100 |  |
| 8 | ID : NSC1010  7-((4-(hydroxy(oxido)amino) anilino) (phenyl) methyl)-8-quinolinol  MW: 372  Ki : 22.36 nM  BE: -10.44  Inhibition (%): 100 |  |
| 9 | ID : NSC84090  7-((4-chloroanilino)(phenyl)methyl)-8-quinolinol  MW: 361  Ki : 2.11 nM  BE: -11.83  Inhibition (%): 100 |  |
| 10 | ID : NSC84096  7-(phenyl(8-quinolinylamino)methyl)-8-quinolinol  MW: 377  Ki : 25.09 nM  BE: -10.37  Inhibition (%): 100 |  |
| 11 | ID : NSC84087  7-((2-methoxyanilino)(phenyl)methyl)-8-quinolinol  MW: 356  Ki : 52.95 nM  BE: -9.93  Inhibition (%): 100 |  |
| 12 | ID : NSC84093  7-(phenyl (4-toluidino) methyl)-8-quinolinol  MW: 340  Ki : 145.66 nM  BE: -9.33  Inhibition (%): 90 |  |
| 13 | RRGC  (Tetrapeptide)  MW: 562  Ki : 72.28 µM  BE: -5.65  Inhibition (%): 00 | RRGC (tetra peptide) |
